# Supplementary material
Source: PubMed Central journal article supplement (PMC3870486)
Supplement: Supp_Fig2.pdf [file Supp_Fig2.pdf]

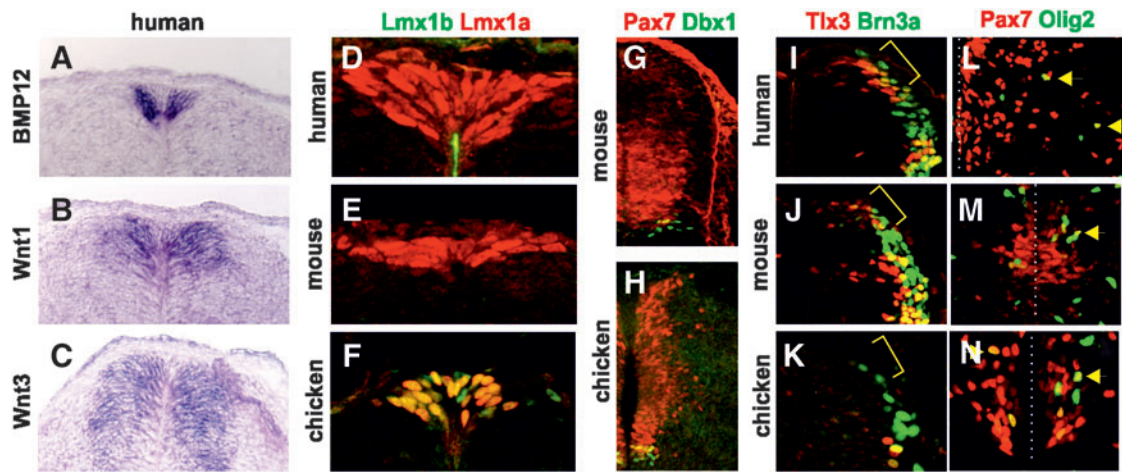

**SUPPLEMENTARY FIG. S2.** A comparative analysis of marker genes during neuronal patterning, neuronal differentiation, and oligodendrogenesis in the dorsal spinal cord. (A–C) Expression of signaling molecules in human roof plate (5 weeks) using in situ hybridization. (D–F) A comparison of Lmx1a and Lmx1b in the human (5 weeks), mouse (E11.5), and chicken (day 4) roof plate. (G, H) Pax7 expression in mouse (E11.5) and chicken (day 4). See Fig. 3I to compare with human. (I–K) Expression of Tlx3 (indicated by *brackets*) in dI1 in human (5 weeks) and mouse (E11.5) but not chicken (day 4.5). (L–N) Demonstration of dorsal oligodendrogenesis (Pax7<sup>+</sup> Olig2<sup>+</sup> cells) (*arrows*) in human (10 weeks), mouse (E15.5), and chicken (day 10). *Dotted lines* indicate the midline. Immunohistochemistry was used in (D–N).
