# Supplementary material
Source: PubMed Central journal article supplement (PMC3870486)
Supplement: Supp_Fig5.pdf [file Supp_Fig5.pdf]

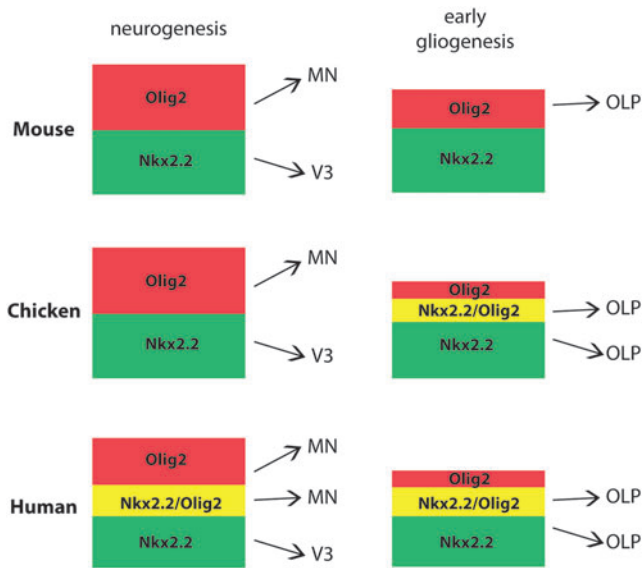

**SUPPLEMENTARY FIG. S5.** Schematic drawing of mouse, chicken and human domain-specific sequential generation of MNs and OLPs. In mouse, MNs and OLPs are sequentially generated from  $Olig2^+$  progenitor cells. In chicken, MNs are generated from  $Olig2^+$  progenitors, while OLPs differentiate from  $Olig2^+Nkx2.2^+$  and  $Olig2^-Nkx2.2^+$  progenitor cells. In contrast to both mouse and chicken, human MN production appears to occur both from  $Olig2^+Nkx2.2^-$  and  $Olig2^+Nkx2.2^+$  progenitor cells, while OLPs are made from differentiating  $Olig2^+Nkx2.2^+$  and  $Olig2^-Nkx2.2^+$  progenitor cells, similar to in chicken. OLP, oligodendrocyte precursor cell; MN, motor neuron.
